# Supplementary material
Source: publisher figshare collection journal article supplement (https://future-science-group.figshare.com/ndownloader/files/28250235)
Supplement: Supplementary file 1 [file 28250235]

Table 5: Main EU Countries publishing in collaboration with CN (online only)

| **#** | **Country** | **# of collaboration** |
| --- | --- | --- |
| 1 | **UK** | 220 |
| 2 | **Germany** | 160 |
| 3 | **Canada** | 154 |
| 4 | **France** | 136 |
| 5 | **Italy** | 127 |
| 6 | **Netherlands** | 127 |
| 7 | **Sweden** | 104 |
| 8 | **Denmark** | 93 |
| 9 | **Spain** | 87 |
| 10 | **Israel** | 71 |
| 11 | **Finland** | 70 |
| 12 | **Switzerland** | 60 |
| 13 | **Belgium** | 57 |
| 14 | **Austria** | 53 |
| 15 | **Greece** | 52 |
